# Supplementary material for: Psoriatic and rheumatoid arthritis joints differ in the composition of CD8+ tissue-resident memory T cell subsets
Source: PubMed Central journal article supplement (PMC10790246; doi:10.1016/j.celrep.2023.112514), 2023-05-16
Supplement: mmc1.pdf [file mmc1.pdf]

**Supplemental information**

**Psoriatic and rheumatoid arthritis joints**

**differ in the composition of CD8+**

**tissue-resident memory T cell subsets**

**Giovanni A.M. Povoleri, Lucy E. Durham, Elizabeth H. Gray, Sylvine Lalnunhlimi, Shichina Kannambath, Michael J. Pitcher, Pawan Dhimi, Thomas Leeuw, Sarah E. Ryan, Kathryn J.A. Steel, Bruce W. Kirkham, and Leonie S. Taams**

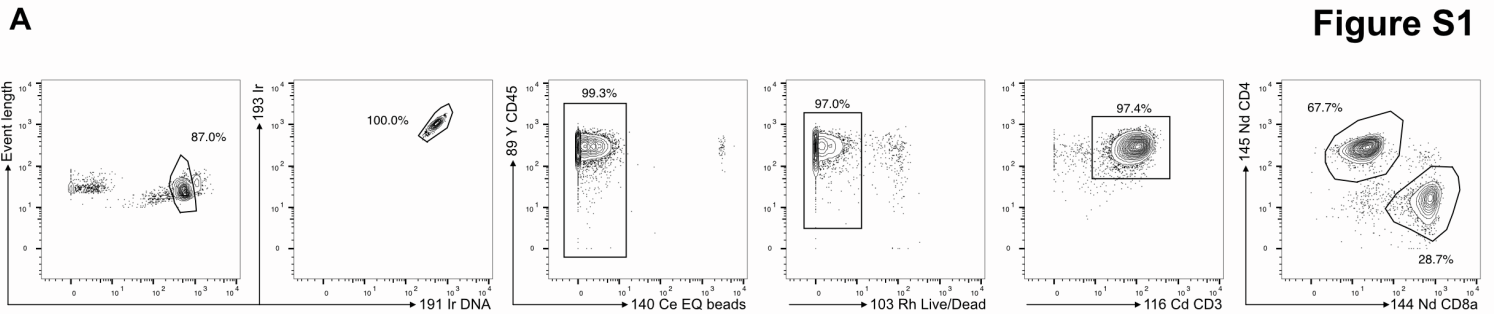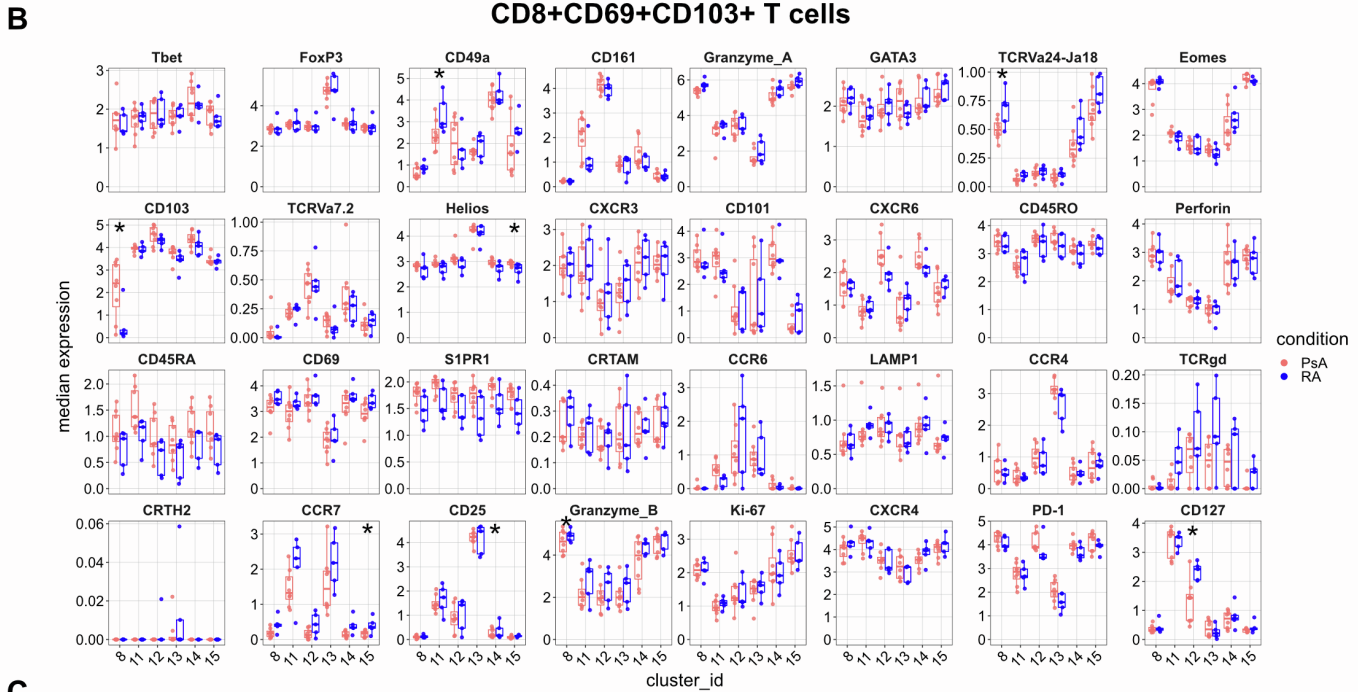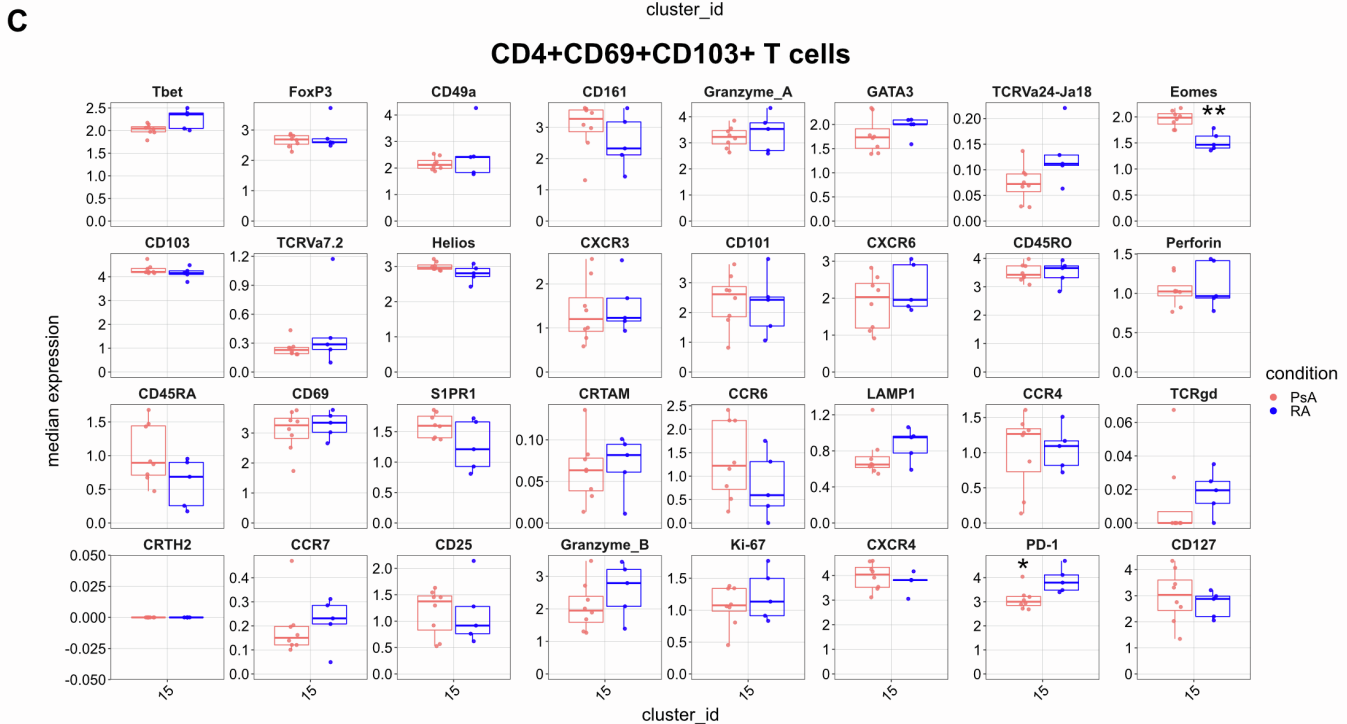

**Figure S1. Gating strategy and phenotypic comparison of synovial CD8+CD69+CD103+ and CD4+CD69+CD103+ TRM cells clusters in patients with PsA and RA; Related to Figures 1,2.** (A) Representative plots demonstrating the gating strategy for sample cleanup and export of total CD8+ and CD4+ T-cells from patients with PsA or RA pre CyTOF analysis inputted into the modified CATALYST analysis pipeline. The gating strategy is shown for intact cells (191Ir+ DNA stain), cells (191Ir+193Ir+), no beads (89Y CD45+140Ce EQ beads-), live (89Y CD45+ 103Rh-), CD3+ (89Y CD45+ 116Cd CD3+) and CD8+ (144Nd CD8a+ 145Nd CD4-) or CD4+ (144Nd CD8a- 145Nd CD4+) cells. (B,C) Cumulative data showing the median arcsinh-transformed expression of the markers across the identified CD8+CD69+CD103+ (B) or CD4+CD69+CD103+ (C) TRM cell clusters from Figure 1C. Values for the two disease conditions are indicated as PsA in red and RA in blue. Boxplots show median and IQR. Data analysed by multiple Mann-Whitney tests with \* $p < 0.05$ . Data from patients with PsA (n=8) or RA (n=5) are shown.

Figure S2

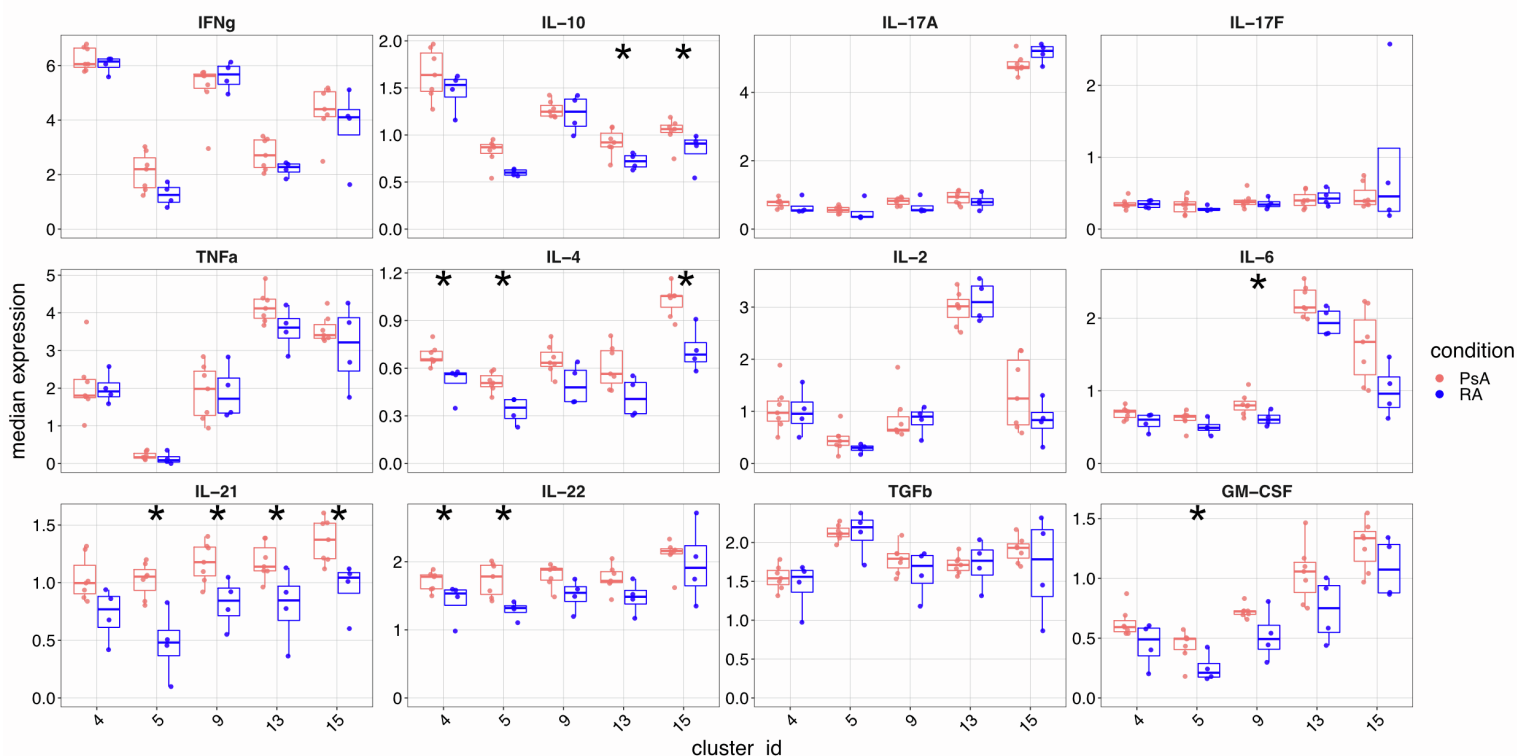

**Figure S2. Cytokine expression comparison of synovial CD8+CD69+CD103+ TRM cells clusters in patients with PsA and RA; Related to Figure 3.** Cumulative data showing the arcsinh-transformed, median expression of cytokines across the identified CD8+CD69+CD103+ TRM cell clusters from Figure 3B (PsA in red and RA in blue). Boxplots show median and IQR. Data analysed by multiple Mann-Whitney tests and \* $p < 0.05$ . Data from patients with PsA (n=7) or RA (n=4) are shown.

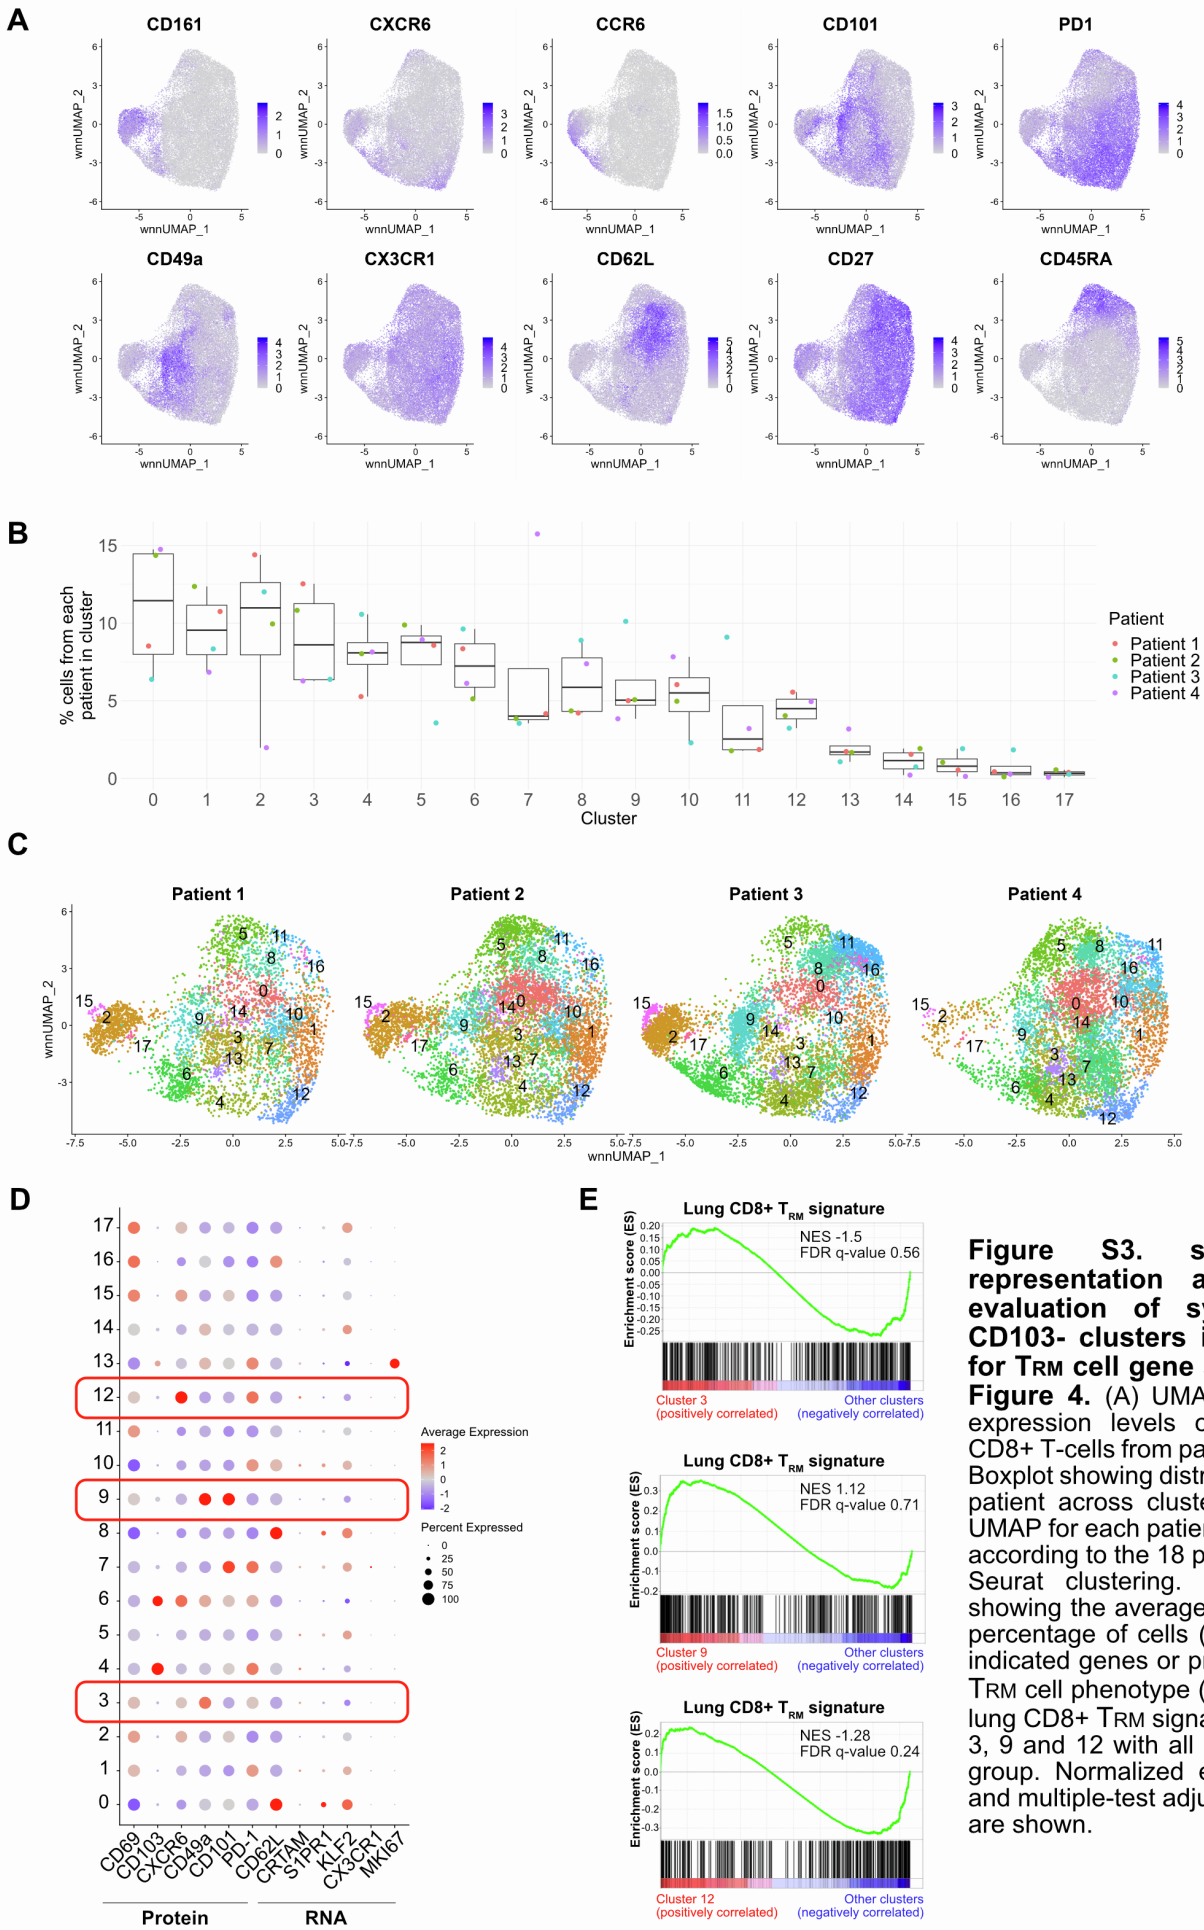



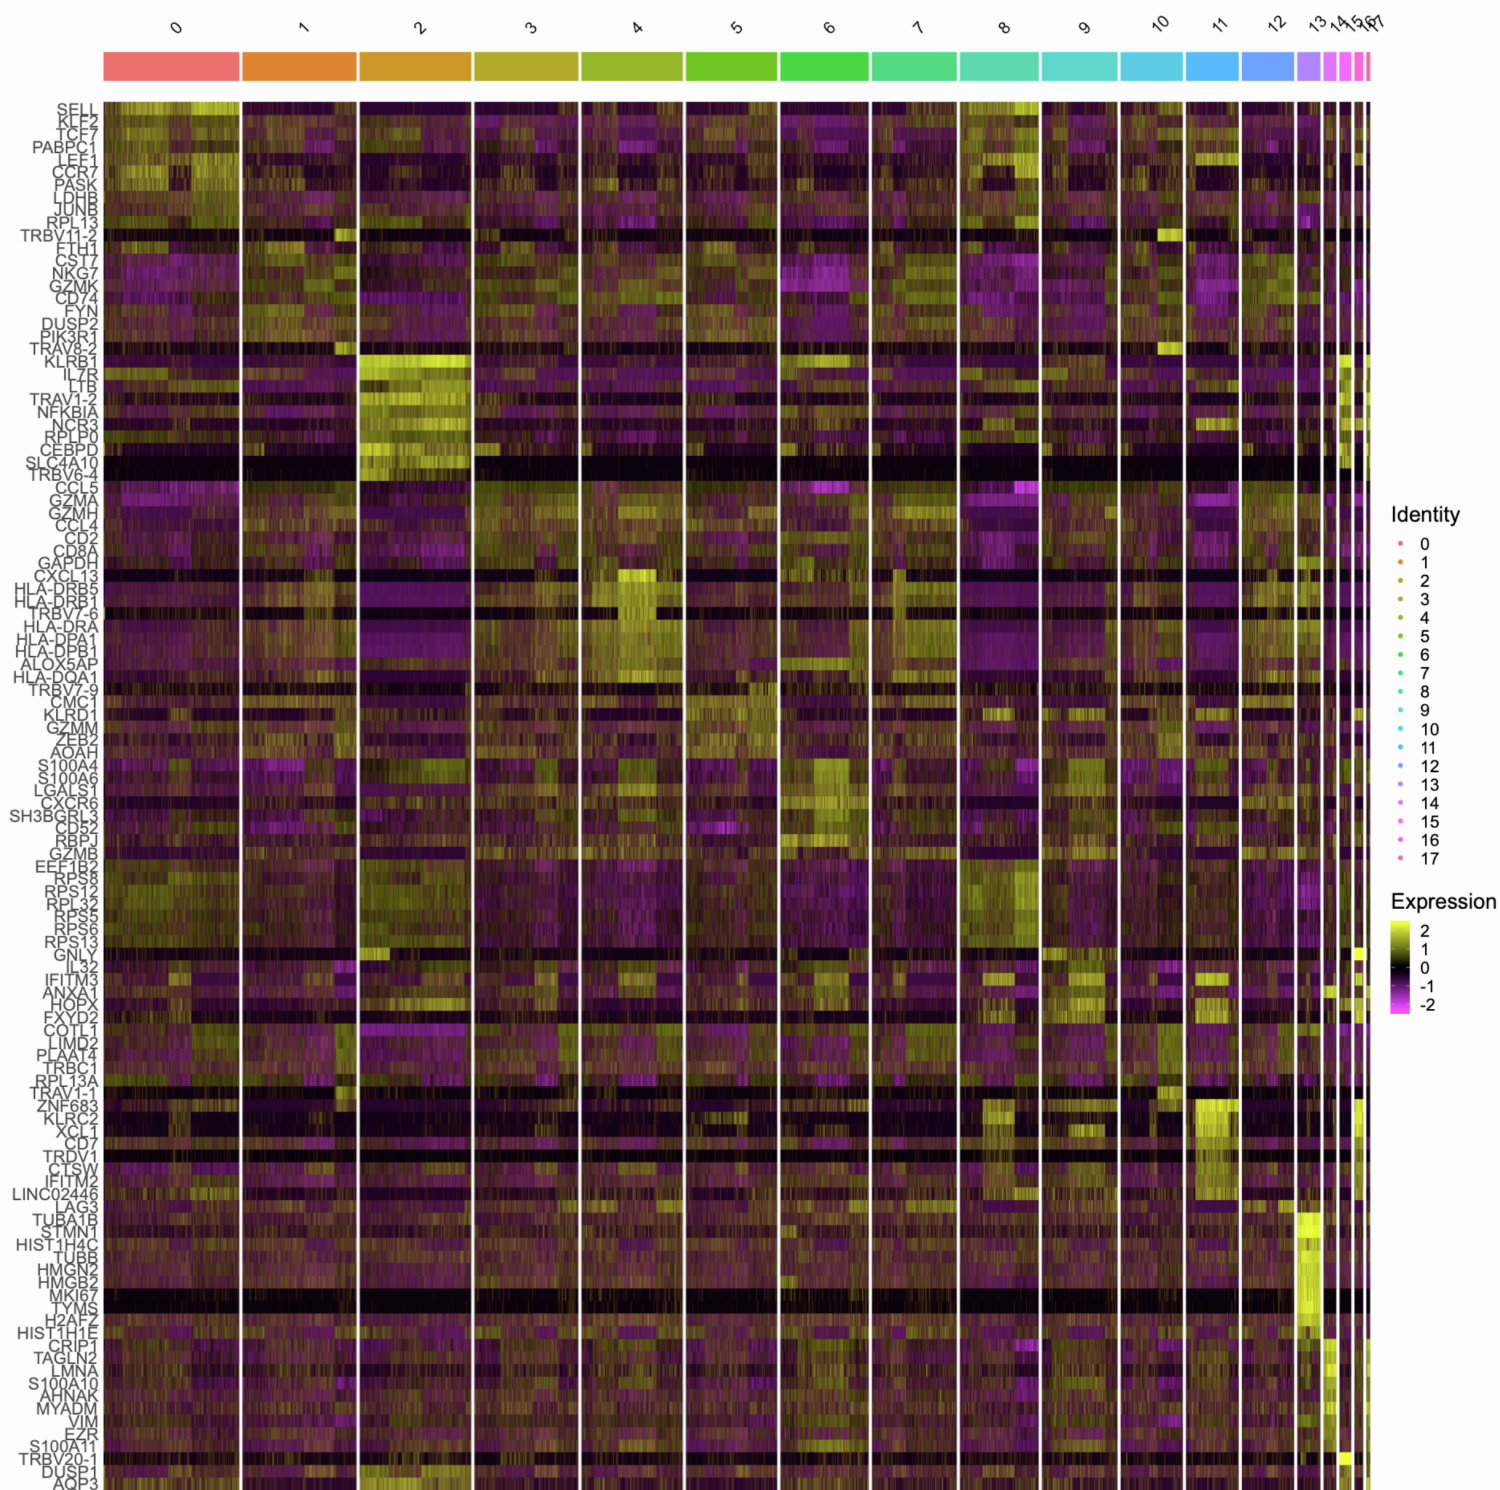

**Figure S4. Heatmap of top 10 differentially expressed genes from each cluster identified in synovial CD8+ cells from patients with PsA; Related to Figure 4.** Heatmap showing the top 10 upregulated genes for each of the 18 clusters from the integrated analysis of CD8+ T cells from n= 4 patients. Upregulated genes were identified by Wilcoxon rank sum test. Within each cluster, genes are ordered by highest to lowest LogFC of SCTransformed RNA expression. Adjusted P-values < 0.05 were considered statistically significant.

A

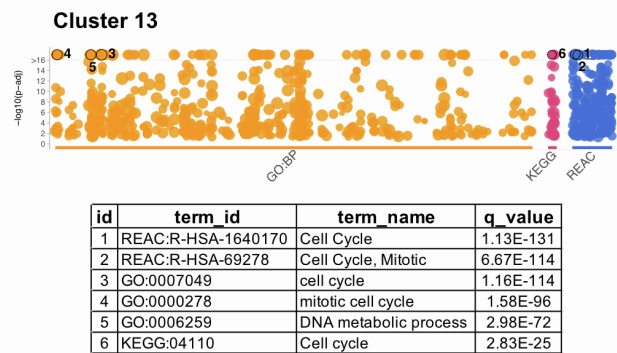

B

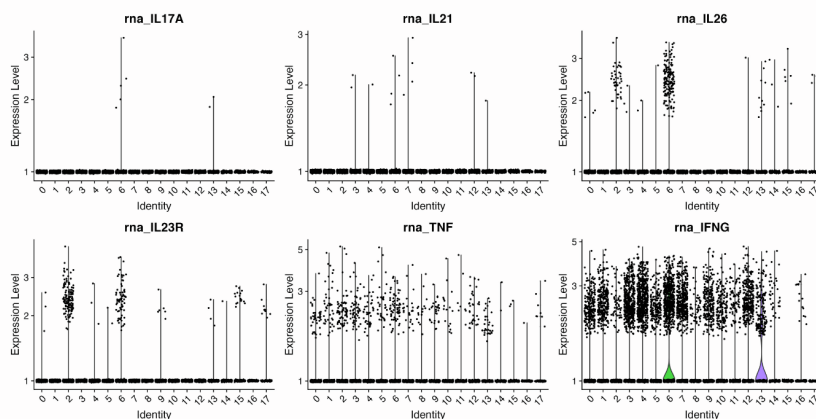

C

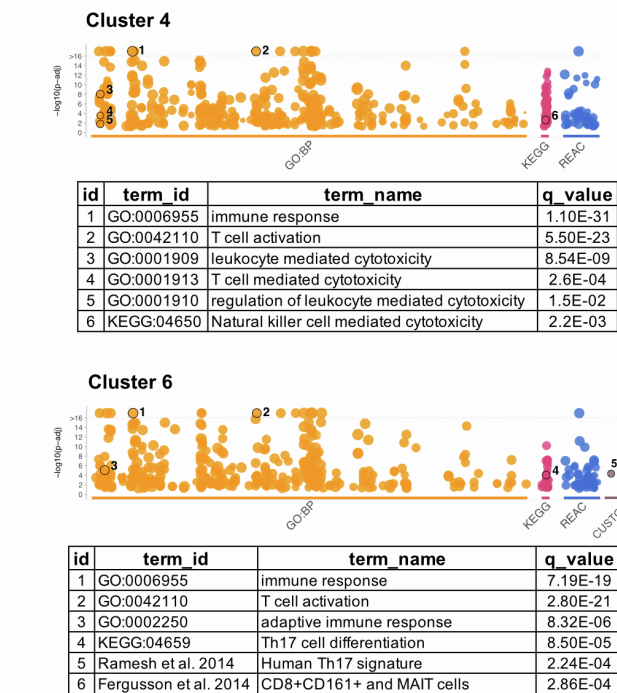

D

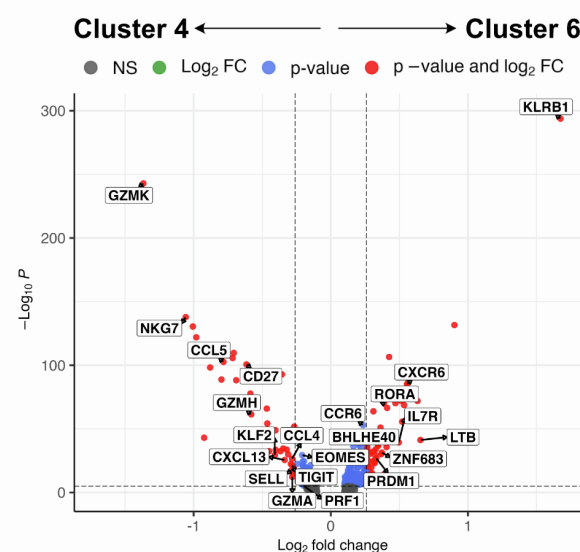

E

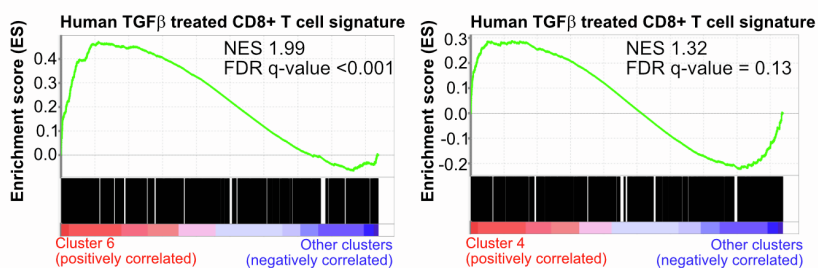

**Figure S5. Functional enrichment analysis and gene signature differences between synovial CD8+CD69+CD103+ TrM clusters identified in patients with PsA; Related to Figure 4.** (A) Manhattan plot showing functional enrichment analysis of differentially upregulated genes in cluster 13 compared to all other clusters. The x-axis shows the biological functions and pathways data sources (terms) and y-axis shows the enrichment p-values ( $-\log_{10}$ ). Each circle corresponds to a single term from an annotation source (colour) and shows the total number of genes annotated to the corresponding term (circle size). Chosen terms for each cluster are indicated with numbers on the plot and corresponding id, name and statistics are shown in the table below the Manhattan plot. (B) Violin plots showing gene expression levels of type 17 and inflammatory cytokines in the different Seurat clusters identified from SF CD8+ T-cells from patients with PsA ( $n=4$ ). (C) Manhattan plots, with associated terms and statistics, showing functional enrichment analysis of differentially upregulated genes in clusters 4 (top) and 6 (bottom) compared to all other clusters. (D) Volcano plot showing significant genes differentially expressed in cluster 6 compared to cluster 4. Differentially expressed genes are identified in blue ( $q$ -value  $< 0.05$ ) or red ( $q$ -value  $< 0.05$  with a  $\pm 1.2$ -fold change ( $n=4$  patients)). (E) GSEA plots for human TGF $\beta$  treated CD8+ T-cell signature, comparing Cluster 6 (left) and 4 (right) with all other clusters;  $n = 4$  per group. Normalized enrichment score (NES) and multiple-test adjusted  $q$ -value from GSEA are shown.

A

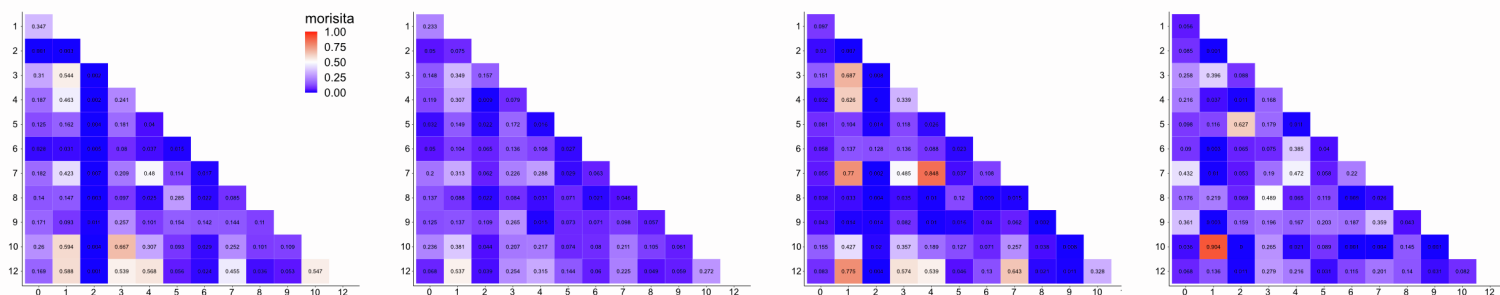

B

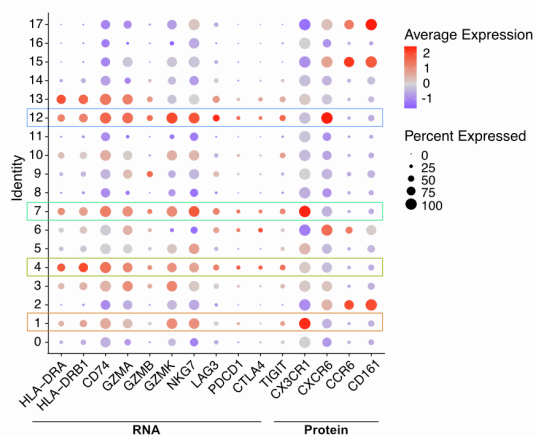

**Figure S6. TCR similarity among donors and comparison of gene signatures between clonally similar clusters identified in synovial CD8+ cells from patients with PsA; Related to Figure 5.** (A) Heatmaps from each donor of the Morisita similarity index measuring TCR composition overlap between the different clusters; index ranging between 0 as minimal and 1 as maximal similarity. (B) Dot plot showing either protein or gene expression of signature markers that defined clusters from Figure 5D. Dot plot heatmap showing the average expression (colour) and percentage of cells (dot size) expressing the indicated genes or proteins. Clusters 1, 4, 7 and 12 have been highlighted with the corresponding cluster colour for ease of comparison (n=4 patients).

A

CD8+CD103- T cells

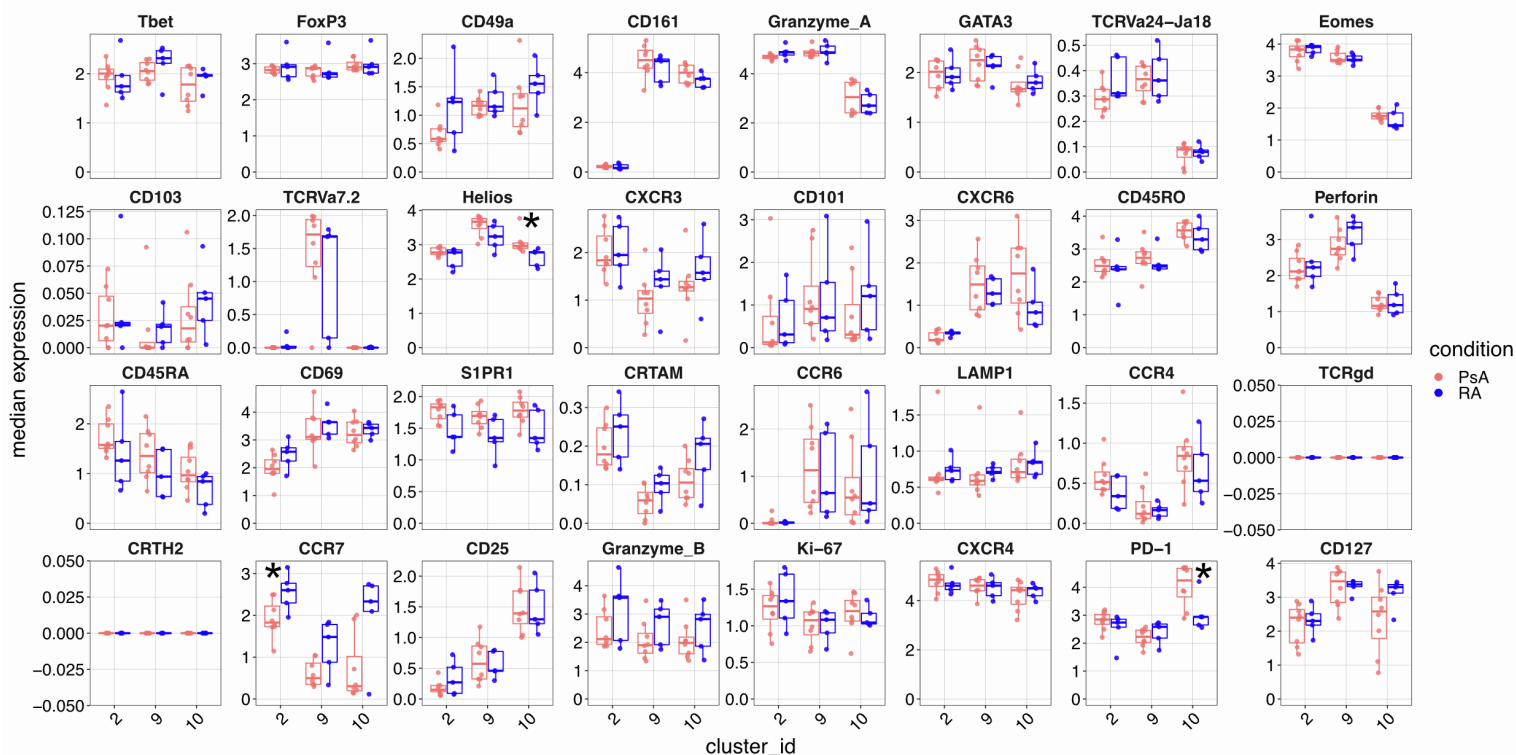

B

CD4+CD103- T cells

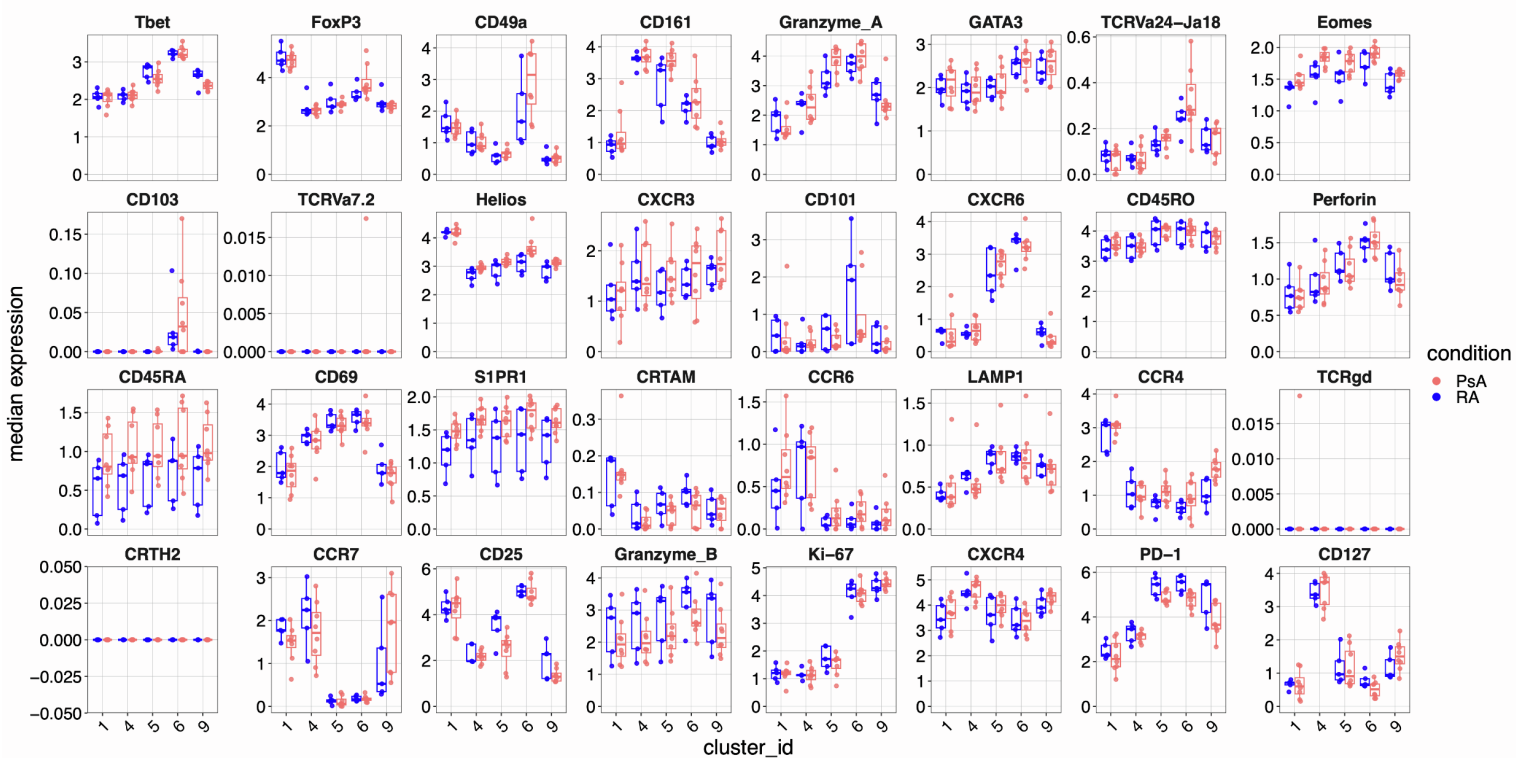

**Figure S7. Phenotypic comparison of synovial CD8+CD103- and CD4+CD103- clusters in patients with PsA and RA; Related to Figure 6.** Cumulative data showing the median arcsinh-transformed expression of the markers across the significantly enriched CD8+CD103- (A) or CD4+CD103- cell clusters in either PsA (red) or RA (blue) from Figure 6. Boxplots show median and IQR. Data analysed by multiple Mann-Whitney tests and \* $p < 0.05$ . Data from patients with PsA (n=8) or RA (n=5) are shown.
